# Supplementary material
Source: PubMed Central journal article supplement (PMC4371832)
Supplement: supp_tpc.114.127605_tcp127605_Supplemental.pdf [file supp_tpc.114.127605_tcp127605_Supplemental.pdf]

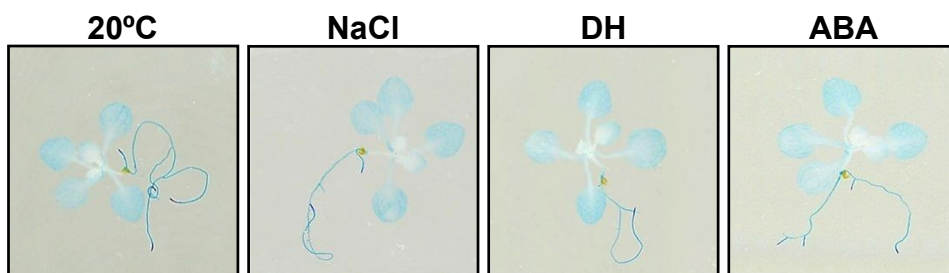

**Supplemental Figure 1. *RC11A* expression is not regulated by NaCl, dehydration or ABA treatments.**

Histochemical analysis of GUS activity in whole 2-week-old seedlings containing the *RC11A<sub>PRO</sub>-GUS* fusion grown under control conditions (20°C), exposed 3 days to 100mM NaCl (NaCl), dehydrated until they lost 30% of their fresh weight (DH), or exposed 3 days to 100mM ABA (ABA).

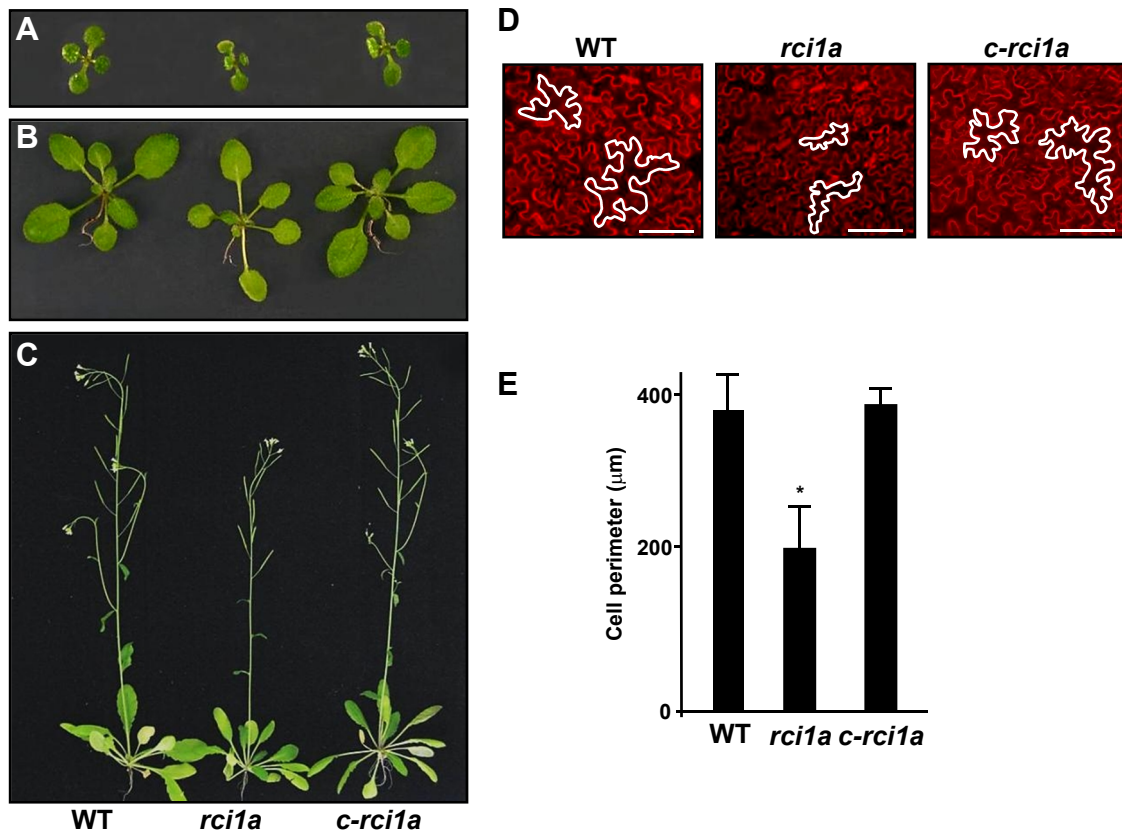

**Supplemental Figure 2. Phenotypic characterization of *rci1a* mutant.**

(A) to (C) Morphological phenotype of Col-0 (WT), *rci1a* and *c-rci1a* plants grown one week (A), 3 weeks (B) and 8 weeks (C) under control conditions.

(D) Confocal microscopy images of leaves from 3-week-old Col-0 (WT), *rci1a* and *c-rci1a* plants. The perimeter of two cells has been highlighted in each photo. Bars=50μm.

(E) Cell sizes, as determined by perimeter measurement, in Col-0 (WT), *rci1a* and *c-rci1a* plants. Values ± SD were obtained for  $n \geq 25$ . Asterisks indicate significant differences ( $p < 0.05$ ) with WT plants.

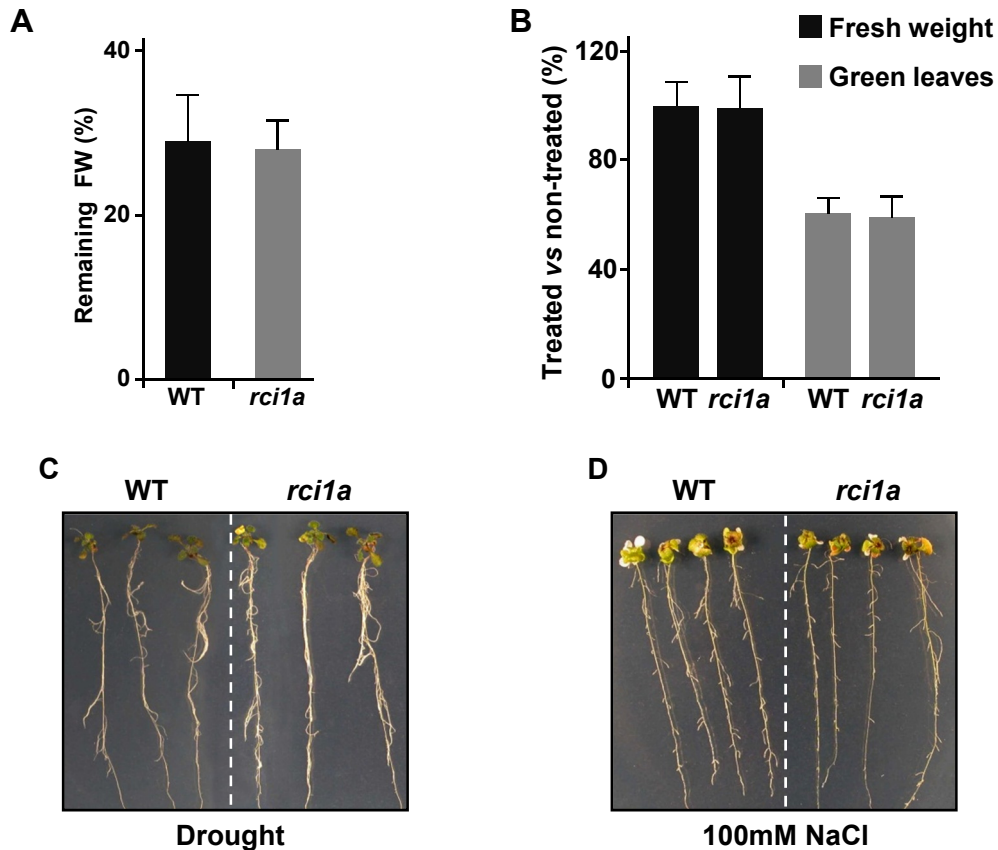

**Supplemental Figure 3. RCI1A is not involved in *Arabidopsis* tolerance to drought and salt stress.**

**(A)** Drought tolerance of 2-week-old Col-0 (WT) and *rci1a* seedlings. Tolerance was estimated as the percentage of remaining fresh weight (FW) after transferring seedlings to a wet filter paper and allowing them to dehydrate for 2 days. Data is the mean of three independent experiments, including at least 20 seedlings per genotype in each experiment. Bars indicate SD.

**(B)** Tolerance to NaCl of 5-day-old Col-0 (WT) and *rci1a* seedlings. Tolerance was estimated as the number of green leaves and remaining fresh weight 14 days after transferring seedlings to plates supplemented with 100mM NaCl. Values are represented as a percentage of the number of green leaves and remaining fresh weight in WT unstressed plants. Data is the mean of three independent experiments, including at least 30 seedlings per genotype in each experiment. Bars indicate SD.

**(C)** and **(D)** Representative Col-0 (WT) and *rci1a* seedlings after being dehydrated 2 days on a wet filter paper **(C)** or exposed 14 days to 100mM NaCl **(D)**.

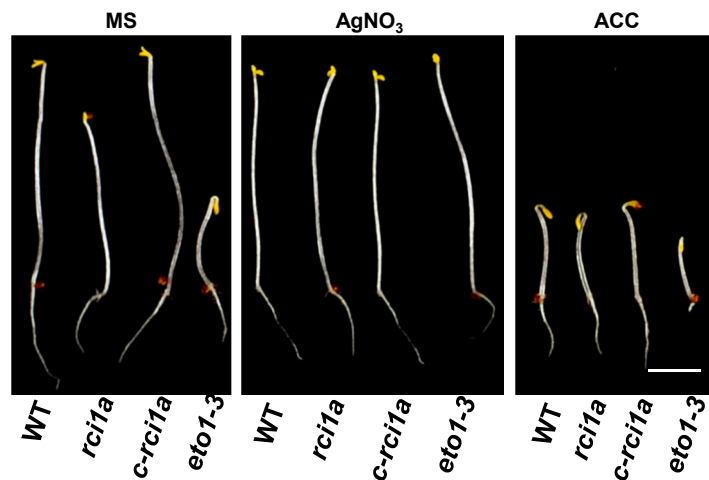

**Supplemental Figure 4. *rci1a* mutants display an ET overproducer phenotype.**

Phenotypes of 4-day-old Col-0 (WT), *rci1a*, *c-rci1a* and *eto1-3* etiolated seedlings germinated in vertical plates containing MS medium (A), MS medium supplemented with 10mM AgNO<sub>3</sub> (AgNO<sub>3</sub>) (B), or in MS medium supplemented with 0.1mM ACC (ACC) (C). Bar = 0,5 cm.

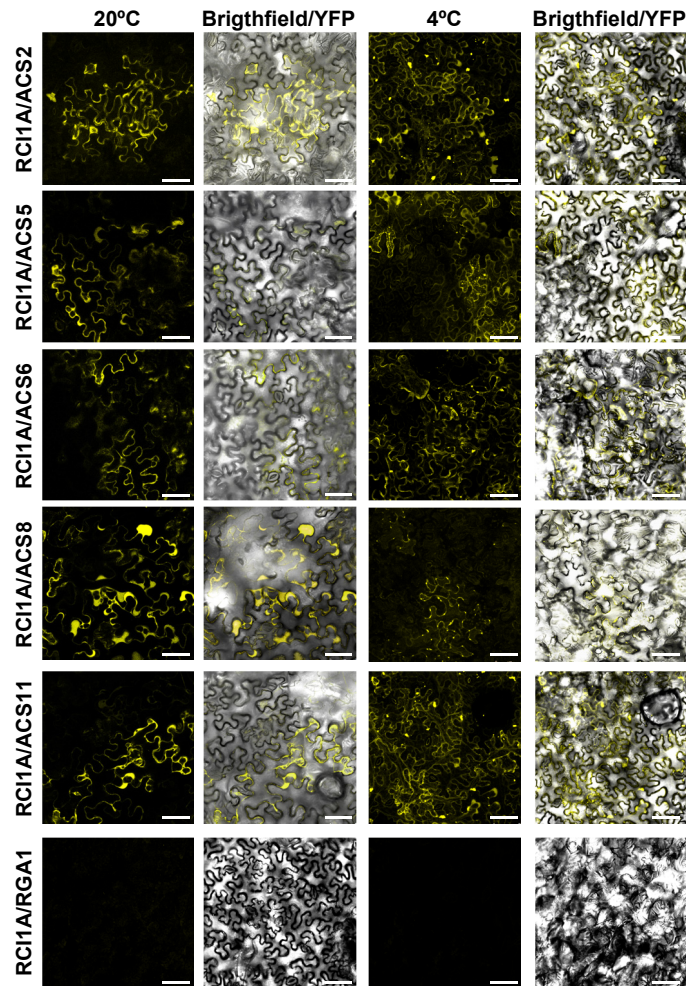

**Supplemental Figure 5. RCI1A interacts with multiple ACS isoforms.**

Visualization of *in vivo* interactions between *Arabidopsis* RCI1A and ACS2, ACS5, ACS6, ACS8, ACS11 and RGA1 proteins by BiFC assays. Interactions of nYFP-RCI1A/cYFP-ACSS and nYFP-RCI1A/cYFP-RGA1 protein pairs were tested by *A. tumefaciens*-mediated transformation in leaves of *N. benthamiana* plants grown at 20°C or exposed 4 hours to 4°C (4°C). Bars=75µm.

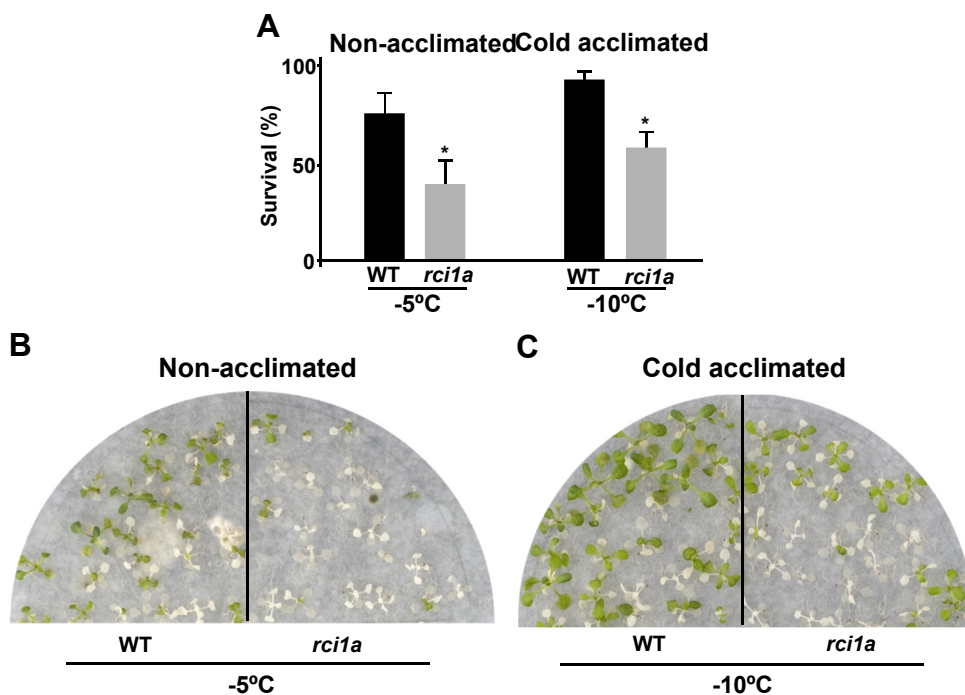

**Supplemental Figure 6. *rci1a* mutants show decreased constitutive freezing tolerance and cold acclimation capacity when growing on MS in petri dishes.**

(A) Freezing tolerance of 2-week-old Col-0 (WT) and *rci1a* seedlings grown in petri dishes on MS medium supplemented with 1% sucrose and exposed to the indicated freezing temperatures, before and after being cold acclimated 5 days at 4°C. In both cases, freezing tolerance was estimated as the percentage of surviving plants after 4 days of recovery under control conditions. Data are expressed as means of three independent experiments with 25 plants each. Bars indicate SD. Asterisks indicate significant differences ( $p < 0.05$ ) with WT plants.

(B) and (C) Representative non-acclimated (B) and cold acclimated (C) Col-0 (WT) and *rci1a* seedlings 4 days after being exposed to -5°C and -10°C for 1 hour, respectively.

## Supplemental Table 1

## Oligonucleotide sequences of primers used in this study

| <b>Mutant genotyping</b> |                                |
|--------------------------|--------------------------------|
| <b>Name</b>              | <b>Sequence 5'-3'</b>          |
| SalK- <i>rci1a</i> 5'    | TTCATCAGTCTCTTCTTATTCC         |
| SalK- <i>rci1a</i> 3'    | ATTATAAAATGACTCTTCCTC          |
| Salk-LB                  | GGCAATCAGCTGTTGCCGTCTCACTGGTG  |
| Salk-RB                  | TGATAGTGACCTTAGGCGACTTTTGAACGC |
| <b>qRT-PCR</b>           |                                |
| <b>Name</b>              | <b>Sequence 5'-3'</b>          |
| RCI1A F                  | AACTTTCATGTGATAATCTGAG         |
| RCI1A R                  | AGTTTTGATTTTCATTAGAAAGG        |
| GUS F                    | GCGCGTTACAAGAAAGCCGG           |
| GUS R                    | AGTCCCGCTAGTGCCTTGTC           |
| CBF1 F                   | GTC AAC ATG CGC CAA GGA TA     |
| CBF1 R                   | TCG GCA TCC CAA ACA TTG TC     |
| CBF2 F                   | GAA TCC CGG AAT CAA CCT GT     |
| CBF2 R                   | CCC AAC ATC GCC TCT TCA TC     |
| CBF3 F                   | CAA CTT GCG CTA AGG ACA        |
| CBF3 R                   | TCT CAA ACA TCG CCT CAT        |
| COR8.5 F                 | CCGATGCGAAAGCTCCGTG            |
| COR8.5 R                 | CTCGAACTTTAGCATTGAGC           |
| GOLS2 F                  | AAGAAGCAACAGACACTTCAGCAG       |
| GOLS2 R                  | TGAAGAGGCGTATGCAGCAAC          |
| OXS3 F                   | CTTATGTTCAAAGAGATGAATCTG       |
| OXS3 R                   | ACATCATCATCATCATCCTCTG         |
| RAV1 F                   | CACATTTCTGTTTTCTCCATTG         |
| RAV1 R                   | TCCATCCTGTATAAGTTACCTAC        |
| ERF11 F                  | GCCGCTCGTGCCTACGACAA           |
| ERF11 R                  | CCACGGTGCTGCTCTGGCTC           |
| RAP2.1 F                 | CCAGAGTCGACGCTCTTCTAGC         |
| RAP2.1 R                 | TCTAGATCAATGGAAAGAGAACAAGAA    |
| ABF1 F                   | GGCCTGGAGAAGGTTGTTGAGAGA       |

|             |                             |
|-------------|-----------------------------|
| ABF1 R      | GCCTGTTTTCGAGCCCTTGATCTA    |
| PK F        | CATCGAGCTAGAGGATTAGAAG      |
| PK R        | GGTATCTAGCATATAGCCGGCGAG    |
| AGP5 F      | CCCGGACCAGCTCCGACCAT        |
| AGP5 R      | GGCGGCTGACTAACCGGAGG        |
| TOC33 F     | CATCCCTTTATCATAGGCGCTCAGTA  |
| TOC33 R     | CCTCTTAAAGTGGCTTTCCACTTGTCT |
| AT4G26410 F | GAGCTGAAGTGGCTTCAATGAC      |
| AT4G26410 R | GGTCCGACATACCCATGATCC       |
| TEM1 F      | CTCTGCTCAAACATCATCGGCGTAA   |
| TEM1 R      | TCGGCTTTTCTTGACGCTCATTCT    |
| TEM2 F      | GCTAAATCGCCGTCTTCCAGAACG    |
| TEM2 R      | TCCTACGACATCGCAGCTTGTAGA    |
| PDF1.2a-F   | CATGGCTAAGTTTGCTTCCA        |
| PDF1.2a-R   | GTTGCATGATCCATGTTTGG        |
| ERF5 F      | ACTTTCCGCTTCTGTCCGCG        |
| ERF5 R      | CGTCCACGTCAGCATAACATCGT     |
| ERF4 F      | TTTTGGACCTGATGGGGATCGGTA    |
| ERF4 R      | GCGATCTAAACGCCGATGTCACAG    |
| DYL1 F      | GCCTTGGCCGCCTCCGTAAG        |
| DYL1 R      | GTTCCAGGGCTCACTGCCGC        |
| MEE3 F      | CACTCCGGACCGTTGGCACA        |
| MEE3 R      | GGCACGTGACCATTCTCGATGCT     |
| P1R3 F      | TGCGACGAGCTCGGGATTCG        |
| P1R3 R      | GCAATGATCGTGGACCAGTGGGA     |
| ACS2 F      | TCCGTTGCACGGAACCTGGA        |
| ACS2 R      | GGATCCGTCCAAGCGCCACA        |
| ACS5 F      | ACGCGGGTTTGTCTGTTGGGT       |
| ACS5 R      | CCAACCCGGTTCGGTGCAGT        |
| ACS6 F      | GGAGGAGACTAAACCGATGGCTGC    |
| ACS6 R      | GGCACAGGCGAATGAGGCGA        |
| ACS8 F      | GAAGAGGTTGTTGATGGACCGTCG    |
| ACS8 R      | ATCGTTCCTCGGGTTCACGGTCGTG   |
| ACS11 F     | CCAGGCTCATCGTGCATTGCCA      |
| ACS11 R     | GCAACCTCCATCGTTTGGTCCGA     |
| COR15A F    | GAAACCGCAGATACATTGGG        |
| COR15A R    | TAACTGATTAGGTAAGACCC        |



|                        |                                                         |
|------------------------|---------------------------------------------------------|
| LTI78 F                | CTGAAGAACGAATCTGATATCG                                  |
| LTI78 R                | CCAGGTCTTCCCTTCGCCAG                                    |
| KIN1 F                 | ATTCGGGTCAAATTTGGGAG                                    |
| KIN1 R                 | TGAATATAAGTTTGGCTCGTC                                   |
| COR47 F                | TCGTTGATTGCATTTGATCC                                    |
| COR47 R                | CACACACAACCTTACACAAAC                                   |
| CHS F                  | TCGCCGAGAACAACCGTGGA                                    |
| CHS R                  | CGGCGGCGCCATCACTGAAA                                    |
| <b>BiFC CONSTRUCTS</b> |                                                         |
| <b>Name</b>            | <b>Sequence 5'-3'</b>                                   |
| inFRCI1A-F             | CGCCACTAGTGGATCAAGATGTGACAAGGGAAGAGAATG                 |
| inFRCI1A-R             | GAGCGGTACCCTCGATTCCGGGTTTCTCGGCAC                       |
| inFACS2 F              | CGCCACTAGTGGATCATGGGTCTTCCGGGAAAAAATAAAGG               |
| inFACS2 R              | GAGCGGTACCCTCGATGCTCGGAGAAGAGGTGAGTGTGG                 |
| inFACS5 F              | CGCCACTAGTGGATCCAGAGAATGAAACAGCTTTTCGAC                 |
| inFACS5 R              | GAGCGGTACCCTCGATCGTTCATCAGGTACACG                       |
| inFACS6 F              | CGCCACTAGTGGATCATGGTGGCTTTTGAACAGAGAAG                  |
| inFACS6 R              | GAGCGGACCCTCGAAAGTCTGTGCACGGACTAGCGGAGAAG               |
| inFACS8 F              | CGCCACTAGTGGATCGAAAATGGGTCTCTTGTCAAAGAAAGCTAG           |
| inFACS8 R              | GAGCGGTACCCTCGATCGTTCCTCGGGTTCACGGTCGTG                 |
| inFACS11 F             | CGCCACTAGTGGATCATGTTGTCAAGCAAAGTTGTTGGCG                |
| inFACS11 R             | GAGCGGTACCCTCGAACGTTCTGATTCACAAGTAACAGAGG               |
| inFRGA F               | CGCCACTAGTGGATCAATGAAGAGAGATCATCACCAATTCC               |
| inFRGA R               | GAGCGGTACCCTCGACGCCGCCGTCGAGAG                          |
| <b>GUS CONSTRUCTS</b>  |                                                         |
| <b>Name</b>            | <b>Sequence 5'-3'</b>                                   |
| P1AMUT                 | CCCTTGTGACTTCTTC                                        |
| P1ACOM                 | GGGGTTCGACAAGTGGCACGGAAGCTGGT                           |
| <b>GFP CONSTRUCTS</b>  |                                                         |
| <b>Name</b>            | <b>Sequence 5'-3'</b>                                   |
| RCI1A promoter GFP     | GGGACAAGTTTGTACAAAAAAGCAGGCTTCTGCCGGAATTTGAATCTGGACATGC |
| RCI1A 3' GFP           | GGGACCACTTTGTACAAGAAAGCTGGGTCTCGGCACCATCGGGCTTTGATGCC   |
